# Supplementary material for: An aptamer array for discriminating tetracycline antibiotics based on binding-enhanced intrinsic fluorescence
Source: Royal Society of Chemistry journal article supplement (doi:10.1039/d3an00154g), 2023-01-01
Supplement: d3an00154g1.pdf [file d3an00154g1.pdf]

**Electronic supplementary information**

**An aptamer array for discriminating tetracycline antibiotics based on binding-enhanced  
intrinsic fluorescence**

Yichen Zhao, Biwen Gao, Yijing Chen and Juewen Liu\*

*Department of Chemistry, Waterloo Institute for Nanotechnology, University of Waterloo, Waterloo,  
Ontario N2L 3G1, Canada; Email: liujw@uwaterloo.ca*

**Family 1**

C49 GGAGGCTCTCGGGACGACCACAGCTTGCTGCGGTCTTTACCAGTAGGTCGTCCCGCCTTTAGGATTACA- 71 #  
C3 GGAGGCTCTCGGGACGACCACAGCTTGCTGCGGGTCTCTCTCCCGTAGGTCGTCCCGCCTTTAGGATTACA- 72 #  
C19 GGAGGCTCTCGGGACGACCACAGCTTGCTGCGGGTCTCCCTCCCGTAGGTCGTCCCGCCTTTAGGATTACA- 72 #  
C4 GGAGGCTCTCGGGACGACCAAAGCTTGCTTCGGTCTCTCGTGTCCGCAAGTCGTCCCGCCTTTAGGATTACA- 72 #  
C59 GGAGGCTCTCGGGACGACCATAGCTTGCTAGGGTCTTCCAACCCAGGTCGTCCCGCCTTTAGGATTACA- 71 #  
C21 GGAGGCTCTCGGGACGACCATAGCTTGCTATCGTTCC-TACACGACAGGTCGTCCCGCCTTTAGGATTACA- 71 #  
C27 GGAGGCTCTCGGGACGACCATAGCATGTATCGTTCC-TACACGACAGGTCGTCCCGCCTTTAGGATTACA- 71 #  
C84 GGAGGCTCTCGGGACGACCATAGCGTGTCTACCGTTTTTCTCGGAGGTCGTCCCGCCTTTAGGATTACA- 72 #  
C66 GGAGGCTCTCGGGACGACCAAAGCTTGCTTTCATTCCCTTAATGCAGGTCGTCCCGCCTTTAGGATTACA- 72 #  
C65 GGAGGCTCTCGGGACGACCATAGCGTGTCTACATTTTCAGAGTGCAGGTCGTCCCGCCTTTAGGATTACA- 72 #  
C39 GGAGGCTCTCGGGACGACCATAGCTTGCTTACAGTGTTCATACTGCAGGTCGTCCCGCCTTTAGGATTACA- 72 #  
C67 GGAGGCTCTCGGGACGACCATAGCTTGCTTACAGTGTTCCTTACTGCAGGTCGTCCCGCCTTTAGGATTACA- 72 #  
C85 GGAGGCTCTCGGGACGACCATAGCTTGCTACTAGCTTTGAGTTAGCAGGTCGTCCCGCCTTTAGGATTACA- 72 #  
C58 GGAGGCTCTCGGGACGACCAAAGCTTGCTTCAAGTTTCACTTTGTAGGTCGTCCCGCCTTTAGGATTACA- 72 #  
C52 GGAGGCTCTCGGGACGACCAGAGCGCTCCATGATATCATCATGCAGGTCGTCCCGCCTTTAGGATTACA- 72 #  
C1 GGAGGCTCTCGGGACGACCACAGCTTGCTGCATGATCTTCTTCTGTAGGTCGTCCCGCCTTTAGGATTACA- 72 #  
C55 GGAGGCTCTCGGGACGACCATAGCTTGCTACAAGTACATCTTGCAGGTCGTCCCGCCTTTAGGATTACA- 72 #  
C62 GGAGGCTCTCGGGACGACCATAGCCAGTACAAGTACATCTTGCAGGTCGTCCCGCCTTTAGGATTACA- 72 #  
C35 GGAGGCTCTCGGGACGACCATAGCTCGCTAGTCCCTCTTTGGACCAGGTCGTCCCGCCTTTAGGATTACA- 72 #  
C10 GGAGGCTCTCGGGACGACCATAGCGCTAAGATGATCTCCATCTCAGGTCGTCCCGCCTTTAGGATTACA- 72 #  
C48 GGAGGCTCTCGGGACGACCATAGCTTGCTAGATCCCTCACGGAGACAGGTCGTCCCGCCTTTAGGATTACA- 72 #  
C53 GGAGGCTCTCGGGACGACCATAGCTTGCTAGATCCCTCG--GAGACAGGTCGTCCCGCCTTTAGGATTACA- 70 #  
C71 GGAGGCTCTCGGGACGACCATAGCATGTATTTCTTTTACTGAAACAGGTCGTCCCGCCTTTAGGATTACA- 72 #  
C78 GGAGGCTCTCGGGACGACCATAGCATGTATTTCTTTT-CTGAAACAGGTCGTCCCGCCTTTAGGATTACA- 71 #  
C75 GGAGGCTCTCGGGACGACCATAGCACGTACAACCTTCTAAGTTGCAGGTCGTCCCGCCTTTAGGATTACA- 72 #  
C76 GGAGGCTCTCGGGACGACCATAGCGTGTATTGATTCCTTTCAACAGGTCGTCCCGCCTTTAGGATTACA- 72 #  
C13 GGAGGCTCTCGGGACGACCAGAGCGTGTCTTACTCCCTTAGTAACAGGTCGTCCCGCCTTTAGGATTACA- 72 #  
C47 GGAGGCTCTCGGGACGACCAGAGCTTGCTTACTCCCTTAGTAACAGGTCGTCCCGCCTTTAGGATTACA- 72 #  
C56 GGAGGCTCTCGGGACGACCAGAGCTTGCTTGTTTCTTTAACAACAGGTCGTCCCGCCTTTAGGATTACA- 72 #  
C87 GGAGGCTCTCGGGACGACCAGAGCATGTCTTGTTTCTTTAACAACAGGTCGTCCCGCCTTTAGGATTACA- 72 #  
C97 GGAGGCTCTCGGGACGACCACAGTCTTGTCTGTCGATNTTATCGATAGGTCGTCCCGCCTTTAGGATTACA- 72 #  
C6 GGAGGCTCTCGGGACGACAAAGGCTTGTCCGTGTCTTGTACATTGTCGTCCCGCCTTTAGGATTACA- 71 #

**Family 2 #**

C9 GGAGGCTCTCGGGACGACGGGCCGCACTTCTGCGCACGTCTACCTTTGTCGTCCCGCCTTTAGGATTACA- 72 #  
C24 GGAGGCTCTCGGGACGACGGGCCGTGTTATTCACGCAGTCTTATCTTTGTCGTCCCGCCTTTAGGATTACA- 72 #  
C42 GGAGGCTCTCGGGACGACGGGCCGTGTTTTACGCAGTCTTATCTTTGTCGTCCCGCCTTTAGGATTACA- 72 #  
C80 GGAGGCTCTCGGGACGACGGGCACAACCTTCTTTGTACGTTTCATCTTTGTCGTCCCGCCTTTAGGATTACA- 72 #  
C29 GGAGGCTCTCGGGACGACGGGCACAACCTTACATTGTACGTTTCATCTTTGTCGTCCCGCCTTTAGGATTACA- 72 #  
C31 GGAGGCTCTCGGGACGACGGGCACAACCTTCAATTGTACGTTTCATCTTTGTCGTCCCGCCTTTAGGATTACA- 72 #

C8 GGAGGCTCTCGGGACGACGGGCAAGATCTATTCTTCACGTTTCATCTTTGTCGTCCCGCCTTTAGGATTACA- 72 #  
C28 GGAGGCTCTCGGGACGACGGGCAAGATCTTTTCTTCACGTTTCATCTTTGTCGTCCCGCCTTTAGGATTACA- 72 #  
C16 GGAGGCTCTCGGGACGACGGGCAAGTCTATACTTCACGTTTCATCTTTGTCGTCCCGCCTTTAGGATTACA- 72 #  
C38 GGAGGCTCTCGGGACGACGGGCAAGTCTTTACTTCACGTTTCATCTTTGTCGTCCCGCCTTTAGGATTACA- 72 #  
C72 GGAGGCTCTCGGGACGACGGGCAAC-TCTTAAGTTCACGTTTCACCTTTGTCGTCCCGCCTTTAGGATTACA- 71 #  
C77 GGAGGCTCTCGGGACGACGGGCAACTCATNNAGTTCACGTTTCACCTTTGTCGTCCCGCCTTTAGGATTACA- 72 #  
C92 GGAGGCTCTCGGGACGACGGGCAACTCAGAGAGTTCACGTTTCACCTTTGTCGTCCCGCCTTTAGGATTACA- 72 #  
C96 GGAGGCTCTCGGGACGACGGGCAACTCATAGAGTTCACGTTTCACCTTTGTCGTCCCGCCTTTAGGATTACA- 72 #  
C30 GGAGGCTCTCGGGACGACTTGGGCAC-TTCCGT--CACGTTTCACCTTTAAGTCGTCCCGCCTTTAGGATTACA- 71  
C93 GGAGGCTCTCGGGACGACATGGGCAGTCTTACT--CACCTCCACGTTTATGTCGTCCCGCCTTTAGGATTACA- 72 #  
C36 GGAGGCTCTCGGGACGACATGGGCCGTTTCATCG--CACGTTTATCTTTATGTCGTCCCGCCTTTAGGATTACA- 72 #  
C40 GGAGGCTCTCGGGACGACATGGGCACAATTTGT--CACCTTATGTTTATGTCGTCCCGCCTTTAGGATTACA- 72 #  
C82 GGAGGCTCTCGGGACGACGGCCTTCGTTGAACT--CAAGTCGTCCCGTGTGTCGTCCCGCCTTTAGGATTACA- 72

### Family 3

C79 GGAGGCTCTCGGGACGACGTAGTCCCGTCTTGGGCCATCGCTTGCGGCGTCGTCCCGCCTTTAGGATTACA- 72 #  
C15 GGAGGCTCTCGGGACGACACAGTCAGATTCTCTGCCGTAAC TTGTTATGTCGTCCCGCCTTTAGGATTACA- 72 #  
C100 GGAGGCTCTCGGGACGACGCAGATCTACCTGTAGTCATAGCTTGCTACGTCGTCCCGCCTTTAGGATTACA- 72 #  
C37 GGAGGCTCTCGGGACGACGCAGGTGCTTCGGATCCATAGCTTGCTACGTCGTCCCGCCTTTAGGATTACA- 72 #  
C99 GGAGGCTCTCGGGACGACGCAGGTGCTTTCGTATCCATAGCTTGCTACGTCGTCCCGCCTTTAGGATTACA- 72 #  
C94 GGAGGCTCTCGGGACGACGCAGAATTCCGATTATTCATAGCGTGCTACGTCGTCCCGCCTTTAGGATTACA- 72 #  
C63 GGAGGCTCTCGGGACGACACAGATAACTTTGTTATCATAGCGTGCTATGTCGTCCCGCCTTTAGGATTACA- 72 #  
C90 GGAGGCTCTCGGGACGACTCAGAGGACCTGTGCCTCATAGCGTGCTAAGTCGTCCCGCCTTTAGGATTACA- 72 #  
C41 GGAGGCTCTCGGGACGACGCAGAGTACTTTGNCTCATAGCGTGCTACGTCGTCCCGCCTTTAGGATTACA- 72 #  
C11 GGAGGCTCTCGGGACGACGCAGACATCTTGTGTGTCATAGCGCGCTACGTCGTCCCGCCTTTAGGATTACA- 72 #  
C46 GGAGGCTCTCGGGACGACGCAGACATCTTGTGTTGTCATAGCGCGCTACGTCGTCCCGCCTTTAGGATTACA- 72 #  
C33 GGAGGCTCTCGGGACGACGCAGACATC-TTTGTGTCATAGCGCGCTACGTCGTCCCGCCTTTAGGATTACA- 71 #  
C50 GGAGGCTCTCGGGACGACGCAGACATC-TTNTGTCATAGCGCGCTACGTCGTCCCGCCTTTAGGATTACA- 71

### Family 4

C26 GGAGGCTCTCGGGACGACATAGCTTGCTACACTCGTCTCCGTAGTGCAAGTCGTCCCGCCTTTAGGATTACA- 72 #  
C68 GGAGGCTCTCGGGACGACATAGCTTGCTACGACTATTTTCATGTCGCAAGTCGTCCCGCCTTTAGGATTACA- 72 #

### Family 5

C34 GGAGGCTCTCGGGACGACGCAGTCTGATTTTTCAGCCATAGTTTTACTACGTCGTCCCGCCTTTAGGATTACA- 72 #  
C57 GGAGGCTCTCGGGACGACGCAGTCTGTTTTTTCAGCCATAGTTTTACTACGTCGTCCCGCCTTTAGGATTACA- 72 #

### Family 6

C20 GGAGGCTCTCGGGACGACGTAATGTTTACCTCGGACCTATGTTCCGTCGTCGTCCCGCCTTTAGGATTACA- 72 #  
C44 GGAGGCTCTCGGGACGACGTAATGTTTACCTCGGACCTTTGTTCCGTCGTCGTCCCGCCTTTAGGATTACA- 72 #

C74 GGAGGCTCTCGGGACGACGTAACGTTTACCTCCAAATGCAGTTTGGTCGTCGTCCCGCCTTTAGGATTTACA- 72 #  
 C25 GGAGGCTCTCGGGACGACGGAACAGTTTACGATGTCCTGTACATGCAATGTCGTCCCGCCTTTAGGATTTACA- 72 #  
 C51 GGAGGCTCTCGGGACGACGTCGCAGCCTTGTGCGTAGTGTTTACCTCGTCGTCCCGCCTTTAGGATTTACA- 72 #  
 C64 GGAGGCTCTCGGGACGACGTTAACAGCTGTGTTATATATCGTTTACCTCGTCGTCCCGCCTTTAGGATTTACA- 72  
 C2 GGAGGCTCTCGGGACGACGCAATGTCCTTCGCAGGATCCGTTTACGGTGTTCGTCCCGCCTTTAGGATTTACA- 72  
 C14 GGAGGCTCTCGGGACGACGCAATGGCCTTCGCAGGATCCGTTTACGGTGTTCGTCCCGCCTTTAGGATTTACA- 72 #

**Family 7**

C22 GGAGGCTCTCGGGACGACAAAGCCGCTTACGTGCATATACTTTTGTGTTCGTCCCGCCTTTAGGATTTACA- 72 #  
 C45 GGAGGCTCTCGGGACGACAAAGCCGCTTACGTGCATATACTTCTGTGTTCGTCCCGCCTTTAGGATTTACA- 72 #

**Family 8 #**

C91 GGAGGCTCTCGGGACGACGTGCTATTGCCTGACGTTT-ATGTTTCAGTTCGTCGTCCCGCCTTTAGGATTTACA- 72 #  
 C83 GGAGGCTCTCGGGACGACGTGCTATTGCCTATCACCCCTTGATAGTTCGTCGTCCCGCCTTTAGGATTTACA- 72 #  
 C73 GGAGGCTCTCGGGACGACGTGCTATTGCCTTGATCACCCGGTCAAGTTCGTCGTCCCGCCTTTAGGATTTACA- 72 #  
 C61 GGAGGCTCTCGGGACGACGTGCTATTGCCTCTTGCCTGTTCAAGAGTTCGTCGTCCCGCCTTTAGGATTTACA- 72 #  
 C70 GGAGGCTCTCGGGACGACGTGCTATTGCCTGTTTCTTGTGTAACAGTTCGTCGTCCCGCCTTTAGGATTTACA- 72 #  
 C81 GGAGGCTCTCGGGACGACGTGCTATTGCCTGTTTCTATGTGTAACAGTTCGTCGTCCCGCCTTTAGGATTTACA- 72 #  
 C89 GGAGGCTCTCGGGACGACGTGCTATTGCCCTGAGCTTCGTTCTGGTTCGTCGTCCCGCCTTTAGGATTTACA- 72 #  
 C23 GGAGGCTCTCGGGACGACGTGCTATTTGCCTCAGTCATTCTCTGAGTTCGTCGTCCCGCCTTTAGGATTTACA- 72 #  
 C32 GGAGGCTCTCGGGACGACGTGCTATTTGCCTCAGTCTTCTCTGAGTTCGTCGTCCCGCCTTTAGGATTTACA- 72

**Family 9**

C98 GGAGGCTCTCGGGACGACTGGACCGTTTACTGGGAGTCTGCACATGTCGTCCCGCCTTTAGGATTTACA- 72 #  
 C43 GGAGGCTCTCGGGACGACTGGACCCTTCTGTGGTAGATTCTATCTAATGTCGTCCCGCCTTTAGGATTTACA- 72  
 C18 GGAGGCTCTCGGGACGACTGGACCCTTTGTGGTGAATTTCCGATATGTCGTCCCGCCTTTAGGATTTACA- 72 #  
 C69 GGAGGCTCTCGGGACGACTGGACCCTTTGTGGTGAATTTCCGATATGTCGTCCCGCCTTTAGGATTTACA- 72

**Family 10**

C5 GGAGGCTCTCGGGACGACATTCGGTGTGATCTCTCCCTTTTGGGTTGGTGTTCGTCCCGCCTTTAGGATTTACA- 72 #  
 C12 GGAGGCTCTCGGGACGACATTCGGTGTGATCTCTCCCTGTTGGGTTGGTGTTCGTCCCGCCTTTAGGATTTACA- 72

**Orphan sequences**

C7 GGAGGCTCTCGGGACGACGGCCAGTGACATTTCTGGGTGCTCACTCGTCGTCCCGCCTTTAGGATTTACA- 72  
 C54 GGAGGCTCTCGGGACGACAACATAGTTTCACTGGGTCTCCGTCACCTTGTTCGTCCCGCCTTTAGGATTTACA- 72  
 C86 GGAGGCTCTCGGGACGACTGGTCGT-TTCCGCGATTCCGTTGATCTCAGTTCGTCCCGCCTTTAGGATTTACA- 71  
 C88 GGAGGCTCTCGGGACGACAGCTTACTCGATTTTTCAGGTTGCATCGATGTCGTCCCGCCTTTAGGATTTACA- 72 #  
 C60 GGAGGCTCTCGGGACGACGCACATCAATCTCTTTGATGCGGGCCGTCGTCCCGCCTTTAGGATTTACA- 72 #  
 C86 GGAGGCTCTCGGGACGACTGGTCGT-TTCCGCGATTCCGTTGATCTCAGTTCGTCCCGCCTTTAGGATTTACA- 71  
 C95 GGAGGCTCTCGGGACGACATCAAGGGTTCCTCTTTAGCTGGGTTTCATGTCGTCCCGCCTTTAGGATTTACA- 72
